# Supplementary material for: Effect of fire on the palatability of plants in an African woodland savanna: varying impacts depending on plant functional groups
Source: PeerJ. 2022 Jan 19;10:e12721. doi: 10.7717/peerj.12721 (PMC8783561; doi:10.7717/peerj.12721)
Supplement: Supplemental Information 1 [file peerj-10-12721-s001.xlsx]

## Sheet: basic data
													Lignin=
site	date	burning	Species	No	site	lab_no	nitrogen %	SCC%	NDF %	Hemicellulose	ADF %	Cellulose	ADL %	Ct %	TP%	Ash %
2	4_15	1	Brachiaria nigropentata	1	A	1	2.05	31.07	68.93	37.88	31.05	28.9	2.15			5.39
2	4_15	1	Brachiaria nigropentata	2	A	2	2.59	34.65	65.35	35.77	29.58	27.06	2.52			5.97
2	4_15	1	Brachiaria nigropentata	3	A	3	2.49	32.96	67.04	37.88	29.16	26.9	2.26			5.5
2	4_15	1	Brachiaria nigropentata	4	A	4	1.94	30.71	69.29	39.03	30.26	27.95	2.31			4.54
2	4_15	1	Brachiaria nigropentata	5	A	5	1.46	29.4	70.6	38.88	31.72	29.38	2.34			4.73
2	4_15	1	Brachiaria nigropentata	6	A	6	1.9	33.78	66.22	35.68	30.54	28.81	1.73			4.45
2	4_15	0	Brachiaria nigropentata	1	B	7	2.16	33.59	66.41	37.31	29.1	27.05	2.05			5.13
2	4_15	0	Brachiaria nigropentata	2	B	8	2.42	35.5	64.5	36.69	27.81	26.33	1.48			5.12
2	4_15	0	Brachiaria nigropentata	3	B	9	2.15	34.29	65.71	32.97	32.74	31.22	1.52			10.28
2	4_15	0	Brachiaria nigropentata	4	B	10	1.6	30.25	69.75	36.76	32.99	30.51	2.48			5.33
2	4_15	0	Brachiaria nigropentata	5	B	11	1.77	30.46	69.54	35.87	33.67	31.41	2.26			5.59
2	4_15	0	Brachiaria nigropentata	6	B	12	1.49	29.44	70.56	36.97	33.59	31.01	2.58			4.67
												0
2	4_15	1	Aristida stipitata	1	A	13	1.22	21.42	78.58	36.79	41.79	36.9	4.89			2.16
2	4_15	1	Aristida stipitata	2	A	14	1.26	22.02	77.98	36.79	41.19	36.55	4.64			2.53
2	4_15	1	Aristida stipitata	3	A	15	1.12	21.3	78.7	35.58	43.12	37.64	5.48			2.54
2	4_15	1	Aristida stipitata	4	A	16	1.19	21.67	78.33	35.69	42.64	37.84	4.8			2.72
2	4_15	1	Aristida stipitata	5	A	17	1.06	20.01	79.99	37.39	42.6	37.2	5.4			2.45
2	4_15	1	Aristida stipitata	6	A	18	0.92	19.55	80.45	37.23	43.22	38.02	5.2			2.15
2	4_15	0	Aristida stipitata	1	B	19	1.03	21.58	78.42	36.35	42.07	36.42	5.65			2.71
2	4_15	0	Aristida stipitata	2	B	20	1.09	21.77	78.23	36.32	41.91	37.43	4.48			2.55
2	4_15	0	Aristida stipitata	3	B	21	0.98	19.73	80.27	36.36	43.91	38.69	5.22			2.54
2	4_15	0	Aristida stipitata	4	B	22	1	19.61	80.39	35.97	44.42	38.74	5.68			2.85
2	4_15	0	Aristida stipitata	5	B	23	0.9	19.65	80.35	36.27	44.08	39.21	4.87			2.44
2	4_15	0	Aristida stipitata	6	B	24	1.08	20.85	79.15	36.94	42.21	37.8	4.41			3.1
												0
2	4_15	1	Digitaria seriata	1	A	25	1.35	32.17	67.83	30.31	37.52	33.11	4.41			5.94
2	4_15	1	Digitaria seriata	2	A	26	0.77	26.11	73.89	32.83	41.06	37.09	3.97			4.02
2	4_15	1	Digitaria seriata	3	A	27	1.27	33.53	66.47	29.75	36.72	33.49	3.23			5.36
2	4_15	1	Digitaria seriata	4	A	28	1.28	31.45	68.55	30.18	38.37	34.12	4.25			4.92
2	4_15	1	Digitaria seriata	5	A	29	1.36	32.6	67.4	28.52	38.88	34.9	3.98			5.11
2	4_15	1	Digitaria seriata	6	A	30	0.89	28.78	71.22	30.33	40.89	37.08	3.81			4.82
2	4_15	0	Digitaria seriata	1	B	31	1.67	32.62	67.38	26.5	40.88	37.88	3			7.31
2	4_15	0	Digitaria seriata	2	B	32	1.04	30.92	69.08	30.55	38.53	35.82	2.71			4.49
2	4_15	0	Digitaria seriata	3	B	33	1.13	30.33	69.67	29.86	39.81	36.21	3.6			5.85
2	4_15	0	Digitaria seriata	4	B	34	1	30.05	69.95	33.32	36.63	33.66	2.97			4.48
2	4_15	0	Digitaria seriata	5	B	35	1.63	33.83	66.17	29.95	36.22	33.68	2.54			5.72
2	4_15	0	Digitaria seriata	6	B	36	1.12	28.46	71.54	32.28	39.26	36.76	2.5			4.24
										0		0
2	4_15	1	Terminalia sericea	1	A	37	2	65.99	34.01	8.88	25.13	17.35	7.78	1.05	5.29	3.89
2	4_15	1	Terminalia sericea	2	A	38	1.62	68.42	31.58	8.2	23.38	11.15	12.23	1.55	7.51	3.42
2	4_15	1	Terminalia sericea	3	A	39	1.46	69.12	30.88	9.5	21.38	14.73	6.65	1.27	6.56	2.61
2	4_15	1	Terminalia sericea	4	A	40	1.73	62.31	37.69	13.48	24.21	15.82	8.39	1.75	6.56	3.17
2	4_15	1	Terminalia sericea	5	A	41	1.51	68.83	31.17	9.91	21.26	14.68	6.58	1.48	7.16	2.8
2	4_15	1	Terminalia sericea	6	A	42	1.54	65.44	34.56	9.91	24.65	15.88	8.77	1.38	6.23	3.02
2	4_15	0	Terminalia sericea	1	B	43	1.2	67.62	32.38	12.68	19.7	13.62	6.08	1.22	6.81	2.47
2	4_15	0	Terminalia sericea	2	B	44	1.54	66.58	33.42	11.17	22.25	14.86	7.39	1.47	6.64	3.1
2	4_15	0	Terminalia sericea	3	B	45	1.46	68.99	31.01	9.99	21.02	14.87	6.15	1.38	8.04	2.44
2	4_15	0	Terminalia sericea	4	B	46	1.39	65.42	34.58	10.19	24.39	16.93	7.46	1.19	6.69	3.04
2	4_15	0	Terminalia sericea	5	B	47	1.37	69.06	30.94	9.21	21.73	17.21	4.52	1.61	8.3	2.53
2	4_15	0	Terminalia sericea	6	B	48	1.3	69.41	30.59	9.49	21.1	14.19	6.91	1.6	7.57	2.7
										0		0
2	4_15	1	Acacia ataxacantha	1	A	49	3.25	76.22	23.78	10.95	12.83	7.67	5.16	1.63	5.91	3.57
2	4_15	1	Acacia ataxacantha	2	A	50	1.9	65.62	34.38	17.12	17.26	9.32	7.94	1.58	4.38	3.99
2	4_15	1	Acacia ataxacantha	3	A	51	3.13	74.32	25.68	12.09	13.59	8.29	5.3	1.56	4.38	4.63
2	4_15	1	Acacia ataxacantha	4	A	52	2.75	70.63	29.37	14.67	14.7	9	5.7	1.69	5.55	3.69
2	4_15	1	Acacia ataxacantha	5	A	53	3.45	77.33	22.67	10.09	12.58	8.07	4.51	2	5.26	4.33
2	4_15	1	Acacia ataxacantha	6	A	54	2.58	70.45	29.55	11.03	18.52	12.28	6.24	1.72	4.62	4.53
2	4_15	0	Acacia ataxacantha	1	B	55	2.09	68.4	31.6	14.89	16.71	9.69	7.02	2.14	5.02	3.7
2	4_15	0	Acacia ataxacantha	2	B	56	2.28	63.59	36.41	18.89	17.52	10.45	7.07	2.68	5.36	3.51
2	4_15	0	Acacia ataxacantha	3	B	57	2.22	72.44	27.56	12.45	15.11	8.56	6.55	2.3	5.07	3.81
2	4_15	0	Acacia ataxacantha	4	B	58	2.1	73.77	26.23	11.8	14.43	8.68	5.75	2.95	5.65	4
2	4_15	0	Acacia ataxacantha	5	B	59	2.07	64.21	35.79	15.35	20.44	11.89	8.55	1.87	3.98	4.16
2	4_15	0	Acacia ataxacantha	6	B	60	1.98	74.71	25.29	11.24	14.05	8.14	5.91	2.54	5.08	3.29
										0		0
2	4_15	1	Philenoptera nelsii	1	A	61	4.89	58.99	41.01	16.12	24.89	17.97	6.92	0	1.63	4.34
2	4_15	1	Philenoptera nelsii	2	A	62	4.65	56.7	43.3	17.47	25.83	18.47	7.36	0	1.41	4.76
2	4_15	1	Philenoptera nelsii	3	A	63	5.08	55.59	44.41	17.72	26.69	19.5	7.19	0	1.42	4.28
2	4_15	1	Philenoptera nelsii	4	A	64	5.2	58.47	41.53	16.38	25.15	18.64	6.51	0	1.49	4.12
2	4_15	1	Philenoptera nelsii	5	A	65	5.67	64.09	35.91	13.61	22.3	16.43	5.87	0	2.07	4.53
2	4_15	1	Philenoptera nelsii	6	A	66	4.8	59.01	40.99	16.57	24.42	17.86	6.56	0	1.74	4.11
2	4_15	0	Philenoptera nelsii	1	B	67	4.36	57.78	42.22	14.67	27.55	19.92	7.63	0	0.88	5.49
2	4_15	0	Philenoptera nelsii	2	B	68	3.53	45.63	54.37	19.16	35.21	22.56	12.65	0	0.96	3.93
2	4_15	0	Philenoptera nelsii	3	B	69	3.58	46.4	53.6	19.99	33.61	22.02	11.59	0	0.88	4.03
2	4_15	0	Philenoptera nelsii	4	B	70	4.48	46.9	53.1	19.43	33.67	23.67	10	0	0.84	4.22
2	4_15	0	Philenoptera nelsii	5	B	71	3.95	48.75	51.25	19.81	31.44	22.17	9.27	0	0.92	3.66
2	4_15	0	Philenoptera nelsii	6	B	72	4.11	47.33	52.67	19.75	32.92	22.72	10.2	0	0.8	3.74
										0		0
2	4_15	1	Grewia flava	1	A	73	2.57	61.17	38.83	16.82	22.01	16.55	5.46	1.51	3.14	8.31
2	4_15	1	Grewia flava	2	A	74	2.69	57.08	42.92	20	22.92	16.5	6.42	1.38	2.87	6.2
2	4_15	1	Grewia flava	3	A	75	2.65	49.88	50.12	24.99	25.13	19.08	6.05	1.52	2.95	6.36
2	4_15	1	Grewia flava	4	A	76	2.17	58.24	41.76	18.49	23.27	16.27	7	1.6	3.31	6.65
2	4_15	1	Grewia flava	5	A	77	2.74	55.92	44.08	19.37	24.71	17.5	7.21	1.17	1.85	7.28
2	4_15	1	Grewia flava	6	A	78	2.82	57.94	42.06	21.74	20.32	14.82	5.5	1.65	2.92	6.76
2	4_15	0	Grewia flava	1	B	79	3.02	50.92	49.08	23.9	25.18	19.49	5.69	1.26	2.34	7.51
2	4_15	0	Grewia flava	2	B	80	2.9	58.76	41.24	16.62	24.62	18.38	6.24	1.11	1.95	6.7
2	4_15	0	Grewia flava	3	B	81	3.02	55.18	44.82	21.01	23.81	17.51	6.3	1.46	2.37	6.7
2	4_15	0	Grewia flava	4	B	82	2.16	53.57	46.43	21.82	24.61	16.31	8.3	1.4	2.77	5.99
2	4_15	0	Grewia flava	5	B	83	3.12	52.79	47.21	22.08	25.13	18.82	6.31	0.97	2.23	6.22
2	4_15	0	Grewia flava	6	B	84	2.78	55.25	44.75	20.06	24.69	18.43	6.26	1.2	2.29	6.35
										0		0
2	4_15	1	Combretum psidioides	1	A	85	2	58.59	41.41	11.98	29.43	21.06	8.37	1.31	5.02	3.48
2	4_15	1	Combretum psidioides	2	A	86	1.78	60.36	39.64	11.34	28.3	19.19	9.11	2.03	6.71	3.25
2	4_15	1	Combretum psidioides	3	A	87	1.72	53.1	46.9	13.76	33.14	23.7	9.44	0.99	5.77	3.98
2	4_15	1	Combretum psidioides	4	A	88	1.81	60.66	39.34	10.77	28.57	20.62	7.95	1.3	6.7	3.39
2	4_15	1	Combretum psidioides	5	A	89	1.74	55.85	44.15	11.12	33.03	23.86	9.17	1.35	5.04	4
2	4_15	1	Combretum psidioides	6	A	90	1.72	57.22	42.78	11.37	31.41	21.67	9.74	2.08	6.19	2.79
2	4_15	0	Combretum psidioides	1	B	91	1.62	58.41	41.59	11.67	29.92	20.61	9.31	1.75	6.8	3.41
2	4_15	0	Combretum psidioides	2	B	92	1.39	62.17	37.83	10.62	27.21	18.93	8.28	2.14	7.78	3.53
2	4_15	0	Combretum psidioides	3	B	93	1.49	60.93	39.07	10.94	28.13	19.66	8.47	1.87	7.57	2.99
2	4_15	0	Combretum psidioides	4	B	94	1.45	55.33	44.67	12.14	32.53	23.31	9.22	1.87	6.54	2.91
2	4_15	0	Combretum psidioides	5	B	95	1.67	58.28	41.72	11.8	29.92	21.84	8.08	1.32	6.97	3.05
2	4_15	0	Combretum psidioides	6	B	96	1.46	58.53	41.47	10.88	30.59	21.31	9.28	1.94	7.58	3.09
										0		0
1	4_15	1	Burkea africana	1	A	97	1.86	60.32	39.68	11.25	28.43	15.92	12.51	2.77	5.77	2.03
1	4_15	1	Burkea africana	2	A	98	1.62	66.8	33.2	9.4	23.8	14.24	9.56	3.69	7.37	1.57
1	4_15	1	Burkea africana	3	A	99	1.72	61.56	38.44	9.89	28.55	15.28	13.27	3.16	5.08	3.23
1	4_15	1	Burkea africana	4	A	100	1.8	67.52	32.48	8.61	23.87	13.33	10.54	3.86	7.41	1.88
1	4_15	1	Burkea africana	5	A	101	1.47	62.37	37.63	9.9	27.73	16.13	11.6	3.91	6.36	1.91
1	4_15	1	Burkea africana	6	A	102	1.54	64.71	35.29	9.64	25.65	15.27	10.38	3.34	5.5	2.13
1	4_15	0	Burkea africana	1	B	103	1.47	61.95	38.05	10.42	27.63	16.2	11.43	3.04	6.49	2.12
1	4_15	0	Burkea africana	2	B	104	1.29	61.94	38.06	10.85	27.21	15.72	11.49	3.42	7.08	1.45
1	4_15	0	Burkea africana	3	B	105	1.44	59.04	40.96	12.11	28.85	17.36	11.49	2.77	4.36	1.76
1	4_15	0	Burkea africana	4	B	106	1.35	58.73	41.27	12.37	28.9	16.93	11.97	2.89	4.83	1.69
1	4_15	0	Burkea africana	5	B	107	1.55	60.21	39.79	11.57	28.22	16.49	11.73	2.53	4.22	1.97
1	4_15	0	Burkea africana	6	B	108	1.3	61.68	38.32	11.54	26.78	15.84	10.94	3.28	4.77	1.69
										0		0
1	4_15	1	Eragrostis cf. jeffrisii	1	A	109	1.38	22.46	77.54	39.71	37.83	33.62	4.21			2.67
1	4_15	1	Eragrostis cf. jeffrisii	2	A	110	1.22	21.09	78.91	39.26	39.65	35.33	4.32			3.57
1	4_15	1	Eragrostis cf. jeffrisii	3	A	111	1.28	21.75	78.25	40.06	38.19	34	4.19			2.81
1	4_15	1	Eragrostis cf. jeffrisii	4	A	112	1.32	22.89	77.11	40.19	36.92	33.53	3.39			2.66
1	4_15	1	Eragrostis cf. jeffrisii	5	A	113	1.18	22.8	77.2	39.41	37.79	34.04	3.75			2.63
1	4_15	1	Eragrostis cf. jeffrisii	6	A	114	1.08	21.94	78.06	38.23	39.83	35.62	4.21			6.27
1	4_15	0	Eragrostis cf. jeffrisii	1	B	115	1.33	21.68	78.32	37.69	40.63	35.39	5.24			2.85
1	4_15	0	Eragrostis cf. jeffrisii	2	B	116	1.27	21.54	78.46	38.3	40.16	34.45	5.71			3.16
1	4_15	0	Eragrostis cf. jeffrisii	3	B	117	1.12	22.42	77.58	39.07	38.51	33.86	4.65			2.41
1	4_15	0	Eragrostis cf. jeffrisii	4	B	118	1.28	21.93	78.07	39.26	38.81	34.38	4.43			3.31
1	4_15	0	Eragrostis cf. jeffrisii	5	B	119	1.23	20.76	79.24	37.81	41.43	37.05	4.38			2.57
1	4_15	0	Eragrostis cf. jeffrisii	6	B	120	1.33	22.46	77.54	37.45	40.09	35.19	4.9			3.14
										0		0
1	4_15	1	Stipagrostis uniplumus	1	A	121	0.92	22.43	77.57	31.55	46.02	39.92	6.1			2.95
1	4_15	1	Stipagrostis uniplumus	2	A	122	0.81	18	82	29.12	52.88	49.95	2.93			1.35
1	4_15	1	Stipagrostis uniplumus	3	A	123	1.09	19.55	80.45	28.65	51.8	48.87	2.93			2.07
1	4_15	1	Stipagrostis uniplumus	4	A	124	0.68	18.07	81.93	30.51	51.42	47.55	3.87			1.39
1	4_15	1	Stipagrostis uniplumus	5	A	125	0.96	22.07	77.93	31.61	46.32	41.88	4.44			2.23
1	4_15	1	Stipagrostis uniplumus	6	A	126	1.02	20.86	79.14	33.23	45.91	41.31	4.6			2.6
1	4_15	0	Stipagrostis uniplumus	1	B	127	0.84	19.07	80.93	30.98	49.95	45.3	4.65			1.81
1	4_15	0	Stipagrostis uniplumus	2	B	128	0.91	19.41	80.59	32.39	48.2	43.49	4.71			1.96
1	4_15	0	Stipagrostis uniplumus	3	B	129	0.98	19.94	80.06	32.1	47.96	42.65	5.31			2.05
1	4_15	0	Stipagrostis uniplumus	4	B	130	0.88	20.34	79.66	31.4	48.26	45.04	3.22			1.89
1	4_15	0	Stipagrostis uniplumus	5	B	131	0.7	17.83	82.17	31.69	50.48	45.9	4.58			1.7
1	4_15	0	Stipagrostis uniplumus	6	B	132	0.84	20.37	79.63	31.5	48.13	44.52	3.61			1.86
										0		0
1	4_15	1	Bauhinia petersiana	1	A	133	2.53	62.41	37.59	13.96	23.63	16.95	6.68	2.12	3.85	4
1	4_15	1	Bauhinia petersiana	2	A	134	2.52	64.97	35.03	13.74	21.29	16.34	4.95	3.24	3.91	3.95
1	4_15	1	Bauhinia petersiana	3	A	135	2.51	64.17	35.83	14.38	21.45	15.94	5.51	3.36	4.35	4.05
1	4_15	1	Bauhinia petersiana	4	A	136	2.85	68.73	31.27	11.73	19.54	14.77	4.77	3.17	4.56	3.42
1	4_15	1	Bauhinia petersiana	5	A	137	2.68	64.54	35.46	13.18	22.28	16.39	5.89	2.98	3.99	3.33
1	4_15	1	Bauhinia petersiana	6	A	138	2.74	66.19	33.81	13.02	20.79	16.06	4.73	2.53	3.68	4.68
1	4_15	0	Bauhinia petersiana	1	B	139	2.73	68.65	31.35	10.37	20.98	15.57	5.41	3.23	4.49	3.29
1	4_15	0	Bauhinia petersiana	2	B	140	2.65	66.91	33.09	11.13	21.96	16.15	5.81	3.16	4.13	3.57
1	4_15	0	Bauhinia petersiana	3	B	141	3.4	59.95	40.05	13.33	26.72	20.79	5.93	1.04	1.57	3.85
1	4_15	0	Bauhinia petersiana	4	B	142	3.4	63.25	36.75	12.48	24.27	18.78	5.49	1.42	2.02	4.65
1	4_15	0	Bauhinia petersiana	5	B	143	3.48	66.93	33.07	12.06	21.01	16.1	4.91	1.85	2.69	3.86
1	4_15	0	Bauhinia petersiana	6	B	144	3.41	70.75	29.25	10.18	19.07	14.77	4.3	2.19	2.91	3.6
